# Supplementary material
Source: PubMed Central journal article supplement (PMC8521275)

Fig 4B

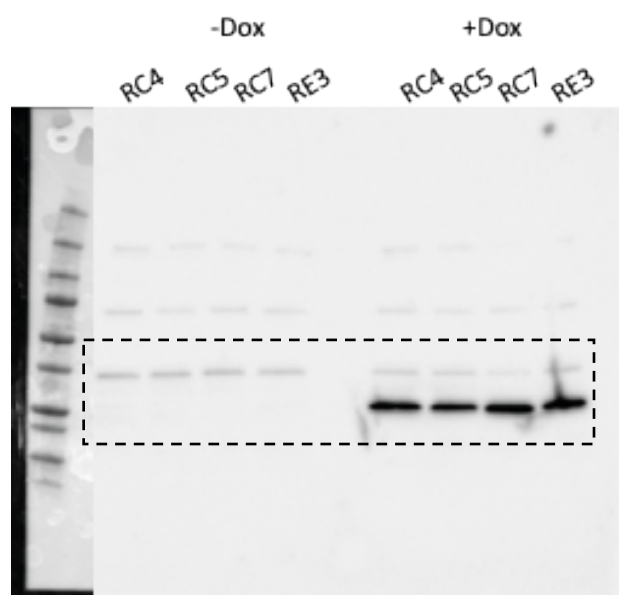

3.5 hrs Dox induction

WB: GAPDH

WB: Bak (DF9)

Supplement: EMBJ-40-e107237-s001.pdf [file EMBJ-40-e107237-s001.pdf]

Fig 3B

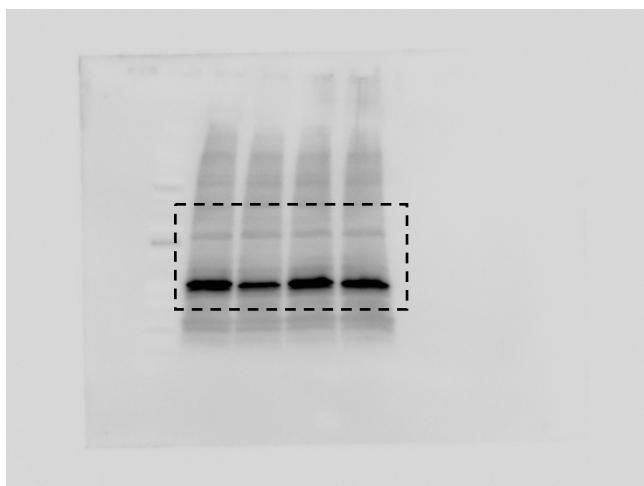

Fig 3C

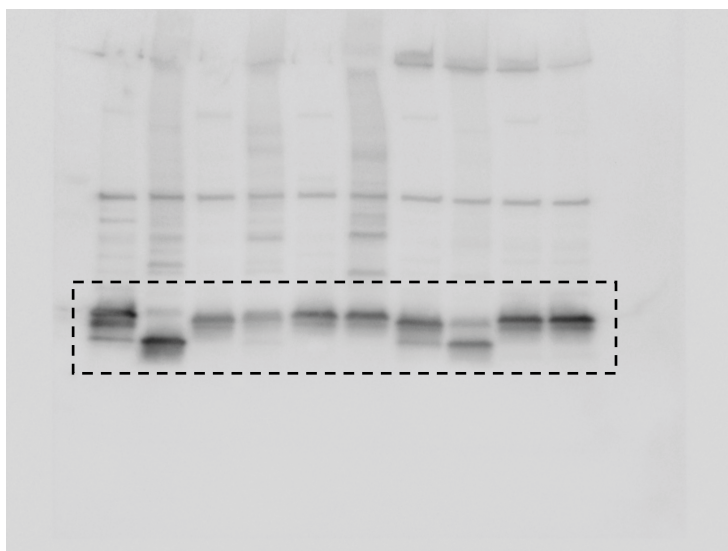

Fig 3D

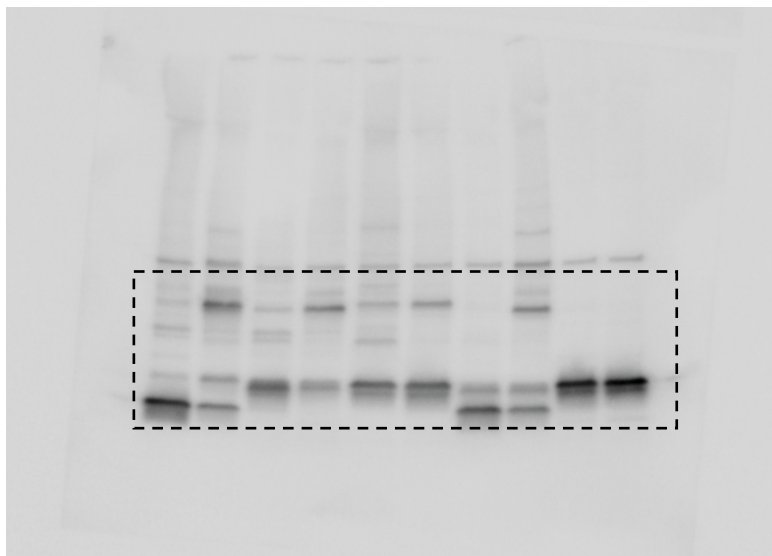

Supplement: EMBJ-40-e107237-s002.pdf [file EMBJ-40-e107237-s002.pdf]

Fig 5D, WB: BAK aa23-32

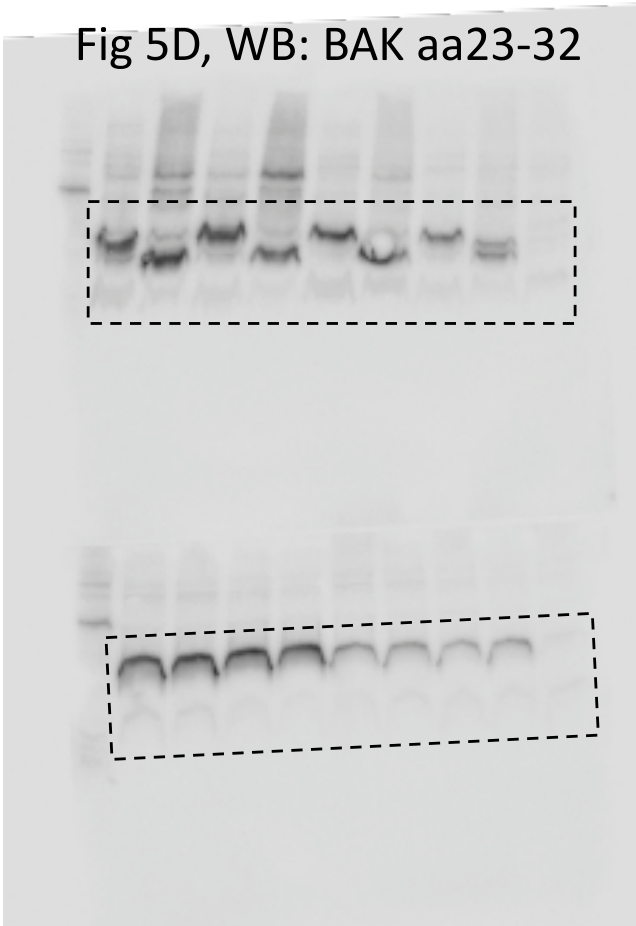

Fig 5E Cytosol, WB: cyt c

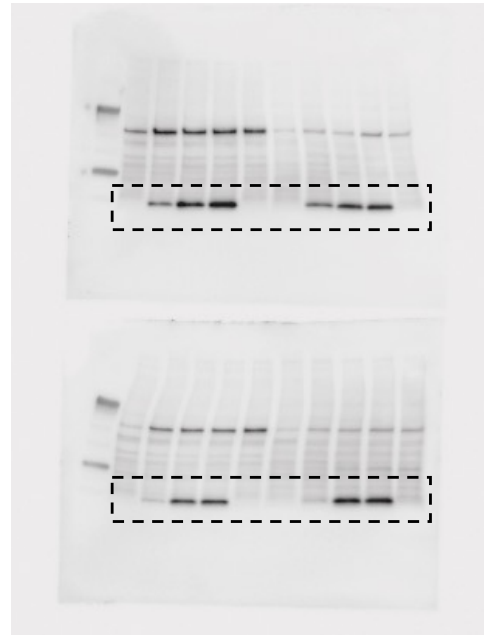

Fig 5E Pellet, WB: cyt c

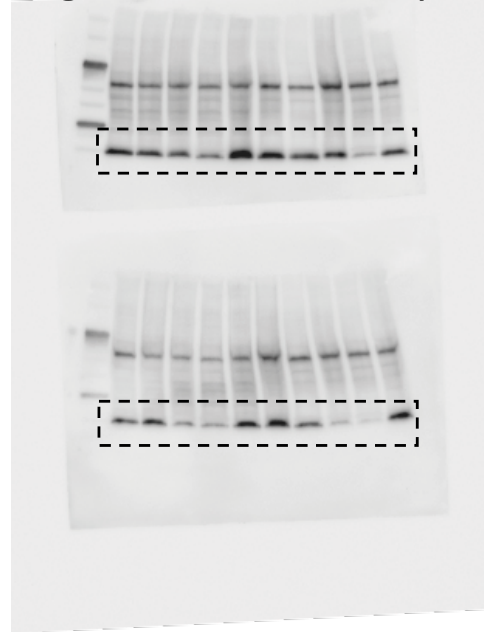

Fig 5D, WB: BAK 4B5

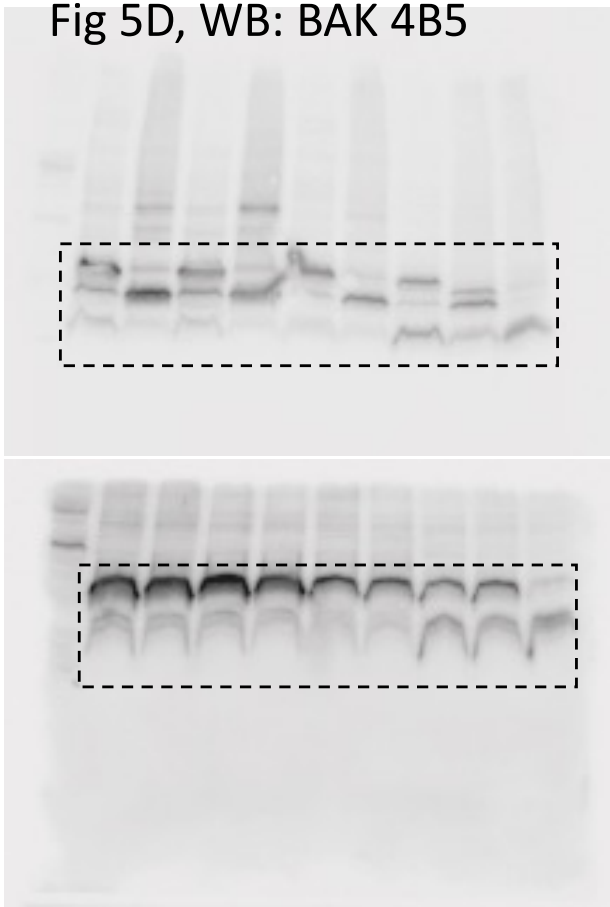

Fig 5E Pellet, WB: BAK

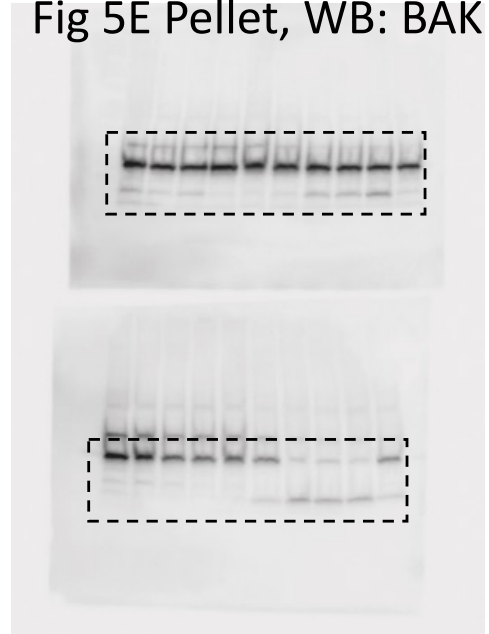

Supplement: EMBJ-40-e107237-s003.pdf [file EMBJ-40-e107237-s003.pdf]

Fig 1B

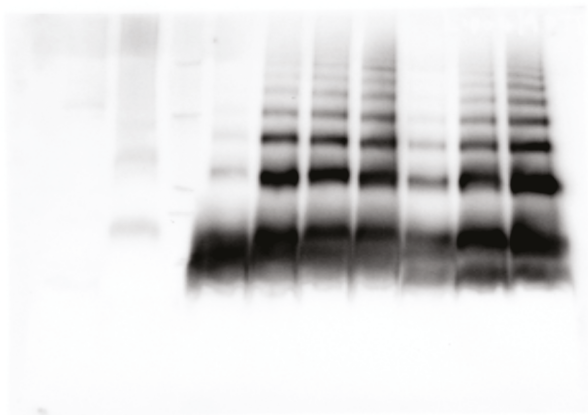

Fig 1C

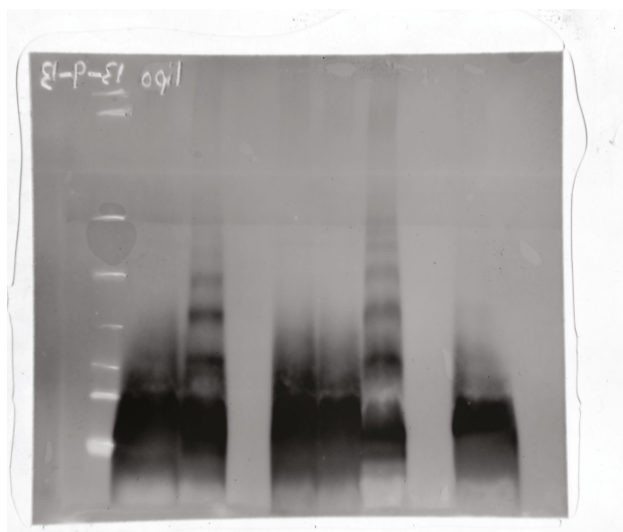

Fig 1D

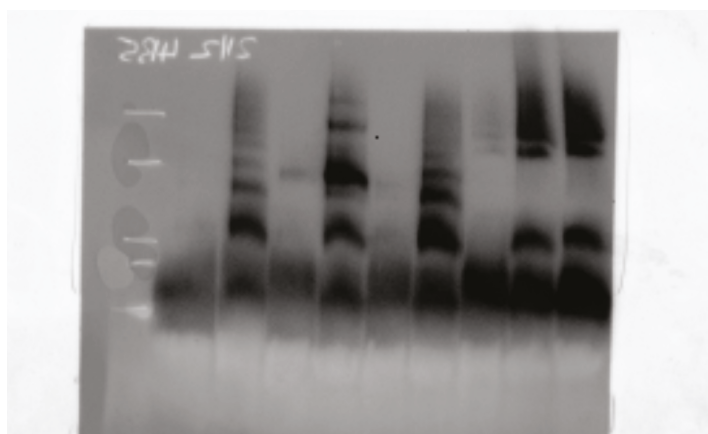

Supplement: EMBJ-40-e107237-s004.pdf [file EMBJ-40-e107237-s004.pdf]
